# Supplementary material for: Principle Superiority and Clinical Extensibility of 2D and 3D Charged Nanoprobe Detection Platform Based on Electrophysiological Characteristics of Circulating Tumor Cells
Source: MDPI journal article supplement (doi:10.3390/cells12020305), 2023-01-13
Supplement: s1 [file s1]

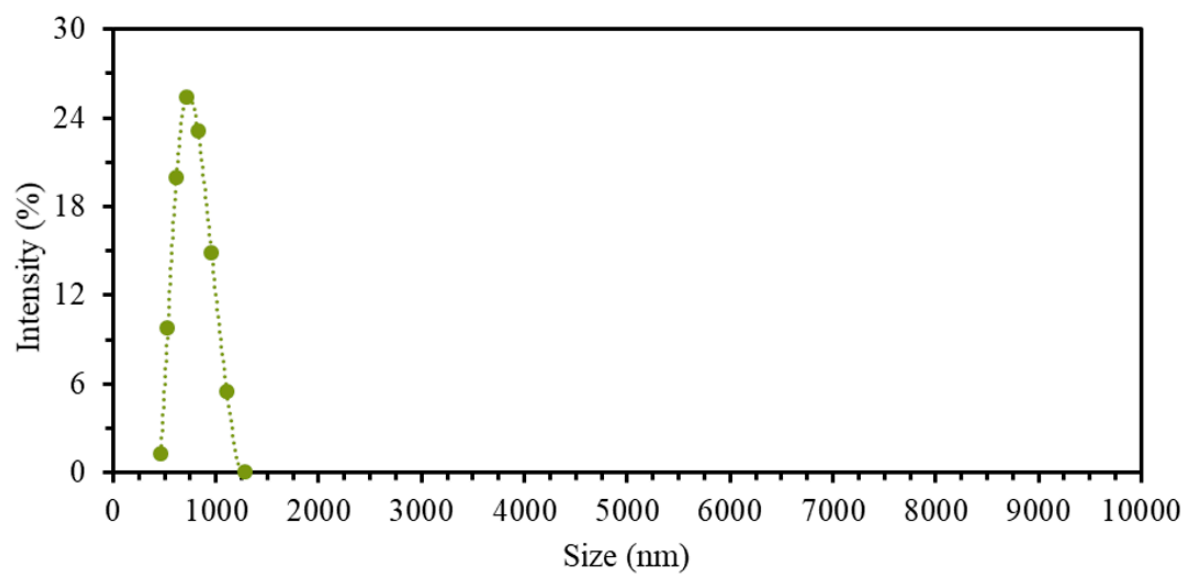

**Supplementary Figure S1.** The size distribution of MNPs(+) nanoprobe.

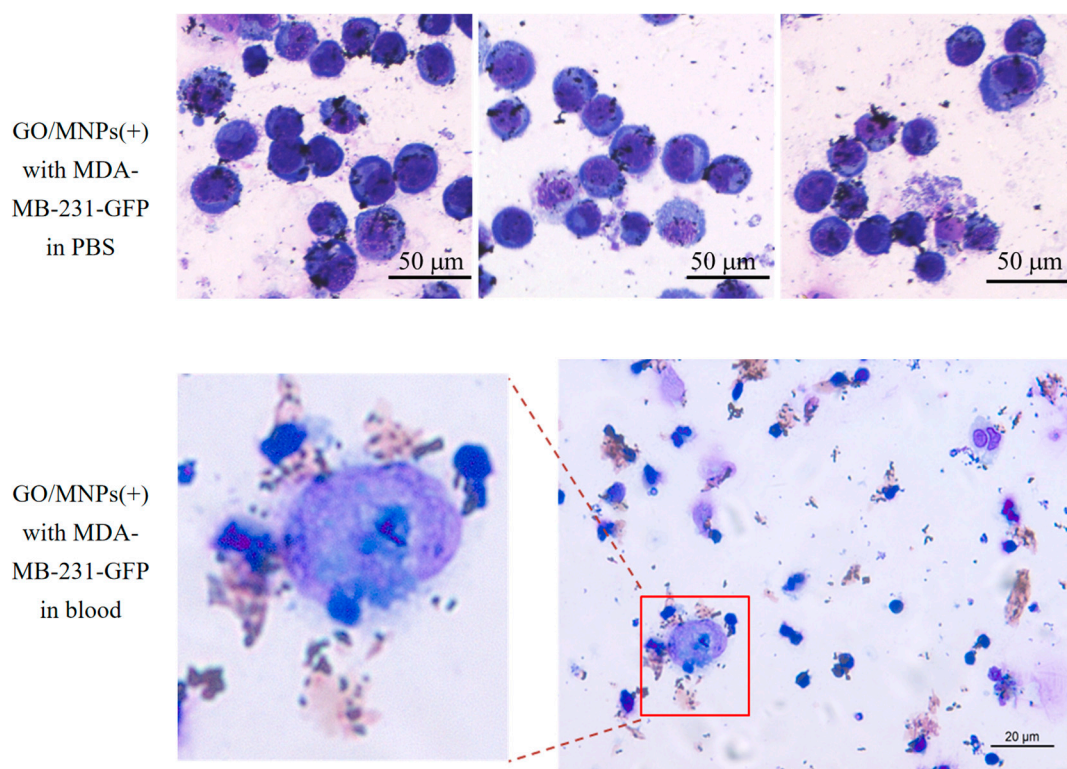

**Supplementary Figure S2.** The microscopic observation of the specific targeting of GO/MNPs(+) to MDA-MB-231-GFP cells in PBS or blood samples.

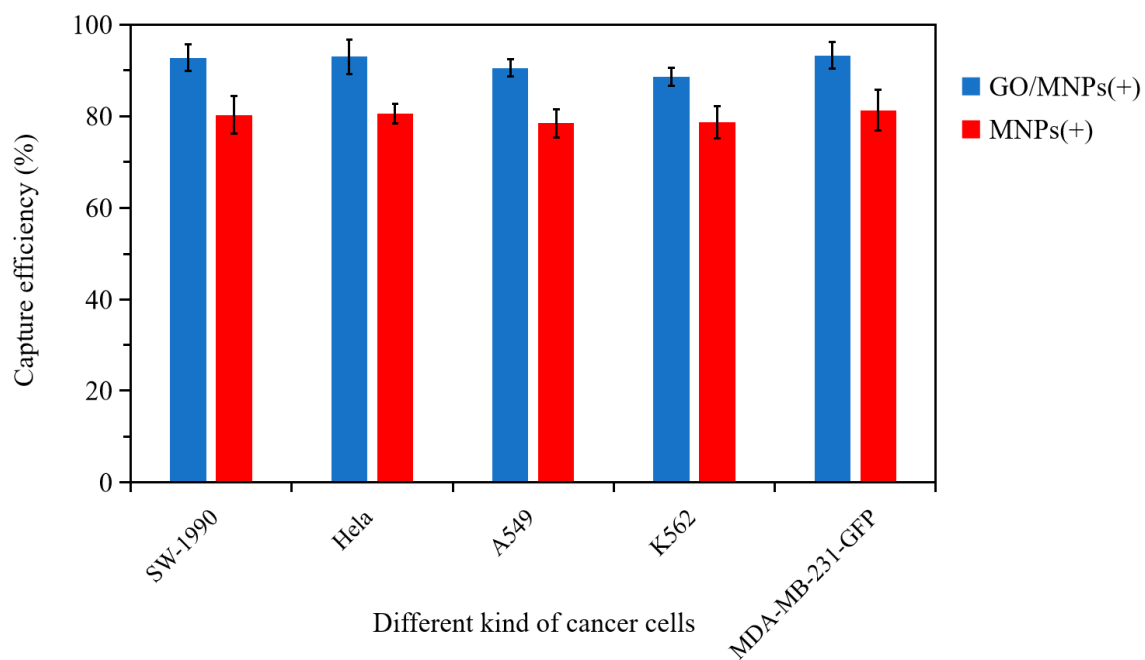

**Supplementary Figure S3.** Broad-spectrum assay of GO/MNPs(+) and MNPs(+) on five different types of cancer cells.

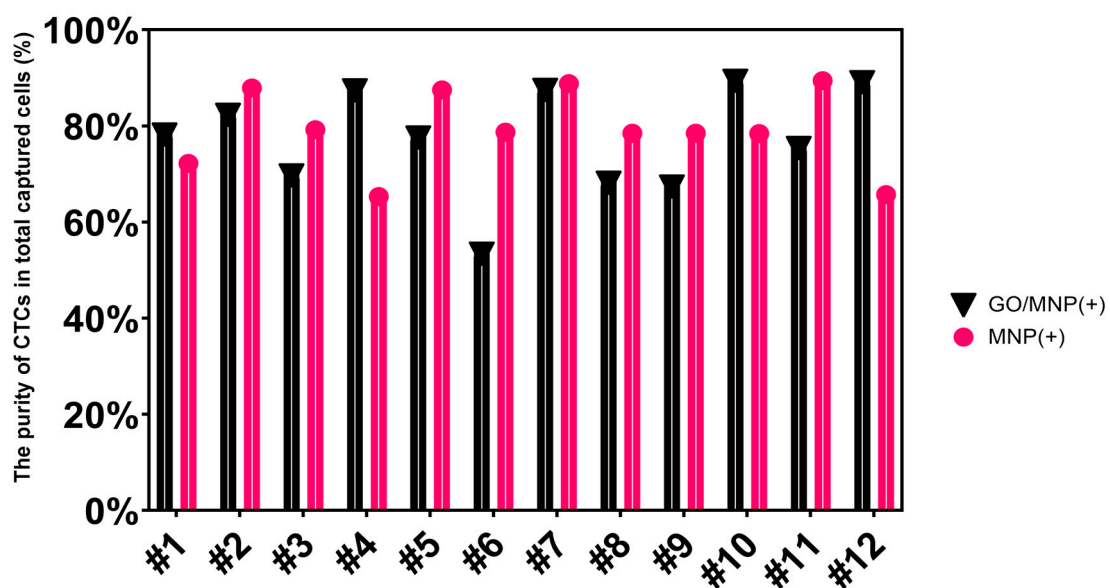

**Supplementary Figure S4.** The purity of CTCs in total captured cells in clinical samples.

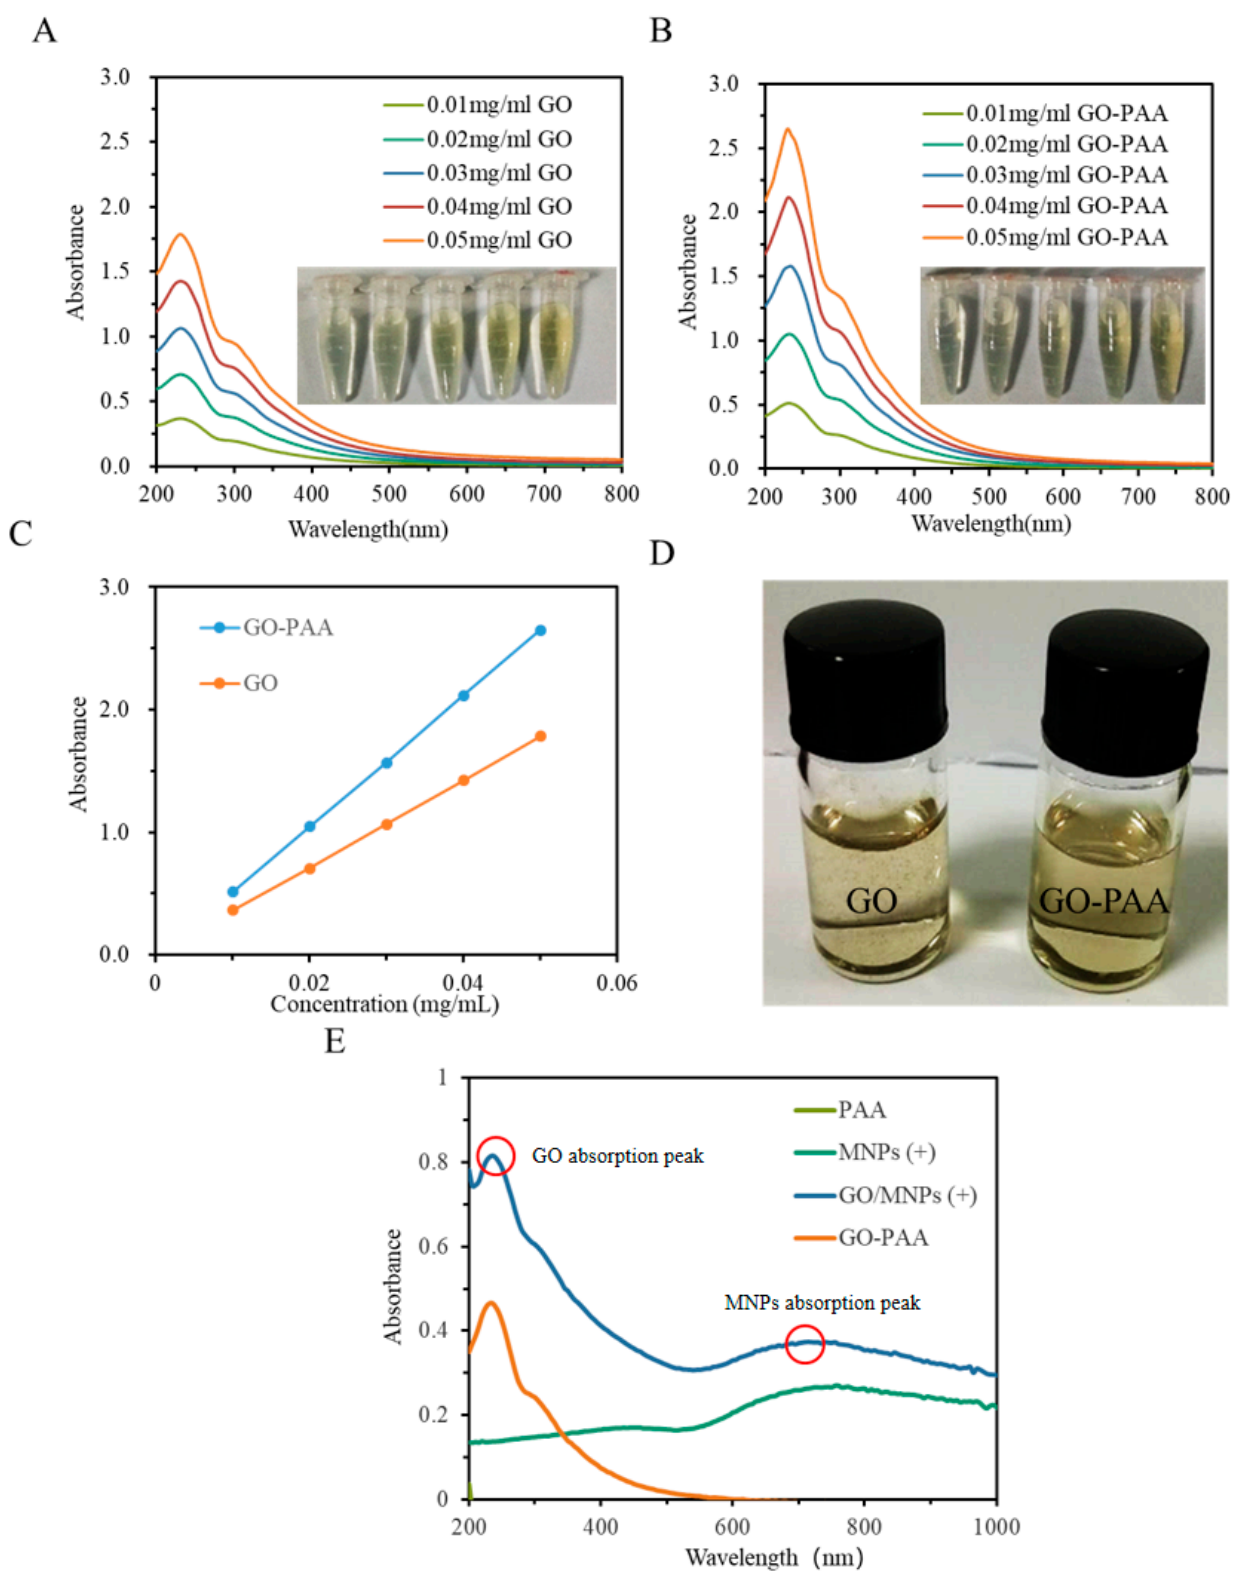

**Supplementary Figure S5.** UV-Vis absorption spectra of (A) GO and (B) GO-PAA; (C) the curve of the relationship between absorbance and concentration at 230 nm in GO and GO-PAA; (D) dispersion of GO and GO-PAA in water for 15 days; (E) UV-Vis absorption spectra of GO-PAA, PAA, MNPs(+), GO/MNPs(+).

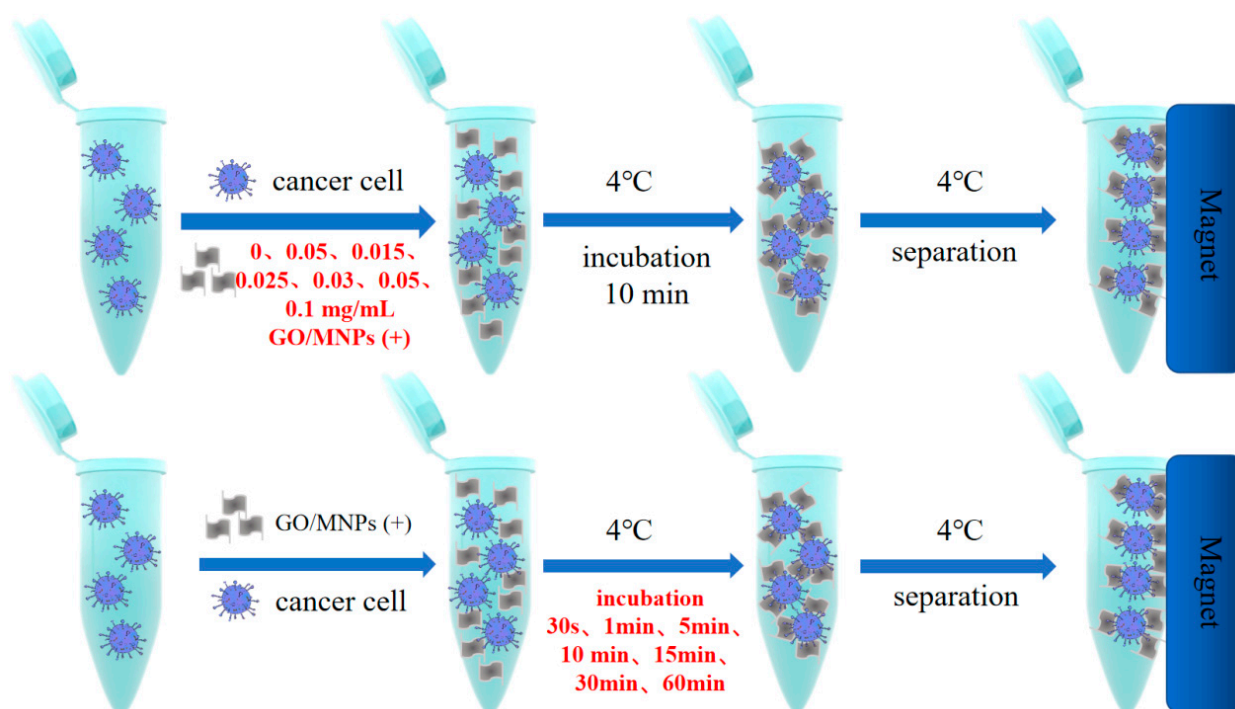

**Supplementary Figure S6.** Schematic of the optimal conditions for the separation of cancer cells using GO/MNP(+) nanoprobes.

**Table S1.** Information of clinical samples.

| Patient ID | Sex | Clinical Diagnosis                      |
|------------|-----|-----------------------------------------|
| #1         | F   | Breast cancer                           |
| #2         | M   | Colon cancer                            |
| #3         | M   | Liver cancer                            |
| #4         | M   | Nasopharyngeal cacinoma                 |
| #5         | M   | Melanoma                                |
| #6         | M   | Hepatobiliary cacinoma                  |
| #7         | F   | Nasopharyngeal cacinoma                 |
| #8         | M   | Hepatic metastasis of pancreatic cancer |
| #9         | M   | Lung cancer                             |
| #10        | F   | Lung cancer                             |
| #11        | F   | Pancreatic cancer                       |
| #12        | F   | Hepatobiliary cacinoma                  |
